# Supplementary material for: DNA Barcoding of Chironomid Larvae (Diptera: Chironomidae) from Large Rivers in South Korea to Facilitate Freshwater Biomonitoring and Public Health Surveillance
Source: MDPI journal article supplement (doi:10.3390/ijerph191912035), 2022-09-23
Supplement: s1 [file s1]

Table S1. Taxonomic key to species of Chironomidae larvae in large South Korean rivers.

1. Head capsule oval, elongated. Eye spots single, round or kidney-shaped. Ligula strongly and distinctively dentate .....(Tanypodinae) ***Procladius choreus***
- 1' Head short. Eye spots more than 2. Ligula not dentate ..... 2
- 2(1') Eye spots 2, different in size, arranged horizontally. Some species with 1 eye-spot, shaped like a comma. Mentum with smaller, irregular-shaped ventromental plate.....(Orthocladiinae) 3
- 2' Eye-spots 2 or 3, similar in size, arranged vertically. Mentum with well developed rectangular- or fan-shaped ventromental plate..... (Chironominae) 4
- 3(2) Antennae 4-segmented. Mentum with bumpy, irregular median tooth..... ***Prosilocerus akamusi***
- 3' Antennae 6-segmented. Mentum with 2 pairs of median teeth and 6 pairs of lateral teeth  
..... ***Hydrobaenus kondoi***
- 4(2') Antennae 5-segmented, with characteristic lauterbone organ. Ventromental plates broad.....  
..... (Tanytarsini) 5
- 4' Antennae 5–8-segmented, with sometimes small or indistinct lauterbone organ. Ventromental plates fan-shaped and well separated.....(Chironomini) 6
- 5(4) Antennal lauterbon organ divided, more than 5x length of antennal segments 3–5 combined.....  
..... ***Tanytarsus kiseogi***
- 5' Antennal lauterbon organ not divided, simple, as long as antennal segments 3–5 combined.....  
..... ***Tanytarsus ahyoni***
- 6(4') Abdominal segment VII with lateral tubules; segment VIII with 2 pairs of ventral tubules ..... 7

|         |                                                                                                          |                                                    |
|---------|----------------------------------------------------------------------------------------------------------|----------------------------------------------------|
| 6'      | Abdominal segment VII without lateral tubules; segment VIII with 1–2 pairs of ventral tubules .....      | 8                                                  |
| 7(6)    | Mentum lateral teeth irregularly arranged .....                                                          | <i>Chironomus circumdatus</i>                      |
| 7'      | Mentum lateral teeth regularly arranged .....                                                            | <i>Chironomus nipponensis, Chironomus plumosus</i> |
| 8(6')   | Abdominal segment VIII with 1 pair of ventral tubules.....                                               | 9                                                  |
| 8'      | Abdominal segment VIII with 2 pair of ventral tubules.....                                               | 10                                                 |
| 9(8)    | Mentum median tooth whole, not dentate; 4th lateral teeth smaller than 5th lateral teeth.....            |                                                    |
|         | .....                                                                                                    | <i>Benthila carbonaria</i>                         |
| 9'      | Mentum median tooth with 4 small teeth; 4th lateral teeth same in size as 3rd or 5th lateral teeth ..... |                                                    |
|         | .....                                                                                                    | <i>Lipiniella moderata</i>                         |
| 10(8')  | Mentum with 1 median tooth.....                                                                          | 11                                                 |
| 10'     | Mentum with more than 2 median teeth.....                                                                | 12                                                 |
| 11(10)  | Median tooth somewhat depressed, lower than 1st lateral teeth .....                                      | <i>Glyptotendipes tokunagai</i>                    |
| 11'     | Median tooth normal, as high as 1st lateral teeth .....                                                  | <i>Dicrotendipes nervous</i>                       |
| 12(10') | Mentum median tooth double-forked; 1st lateral teeth smaller than 2nd lateral teeth .....                |                                                    |
|         | .....                                                                                                    | <i>Polypedilum yonsanensis</i>                     |
| 12'     | Mentum median tooth triple-forked; 1st lateral teeth similar in size to 2nd lateral teeth .....          |                                                    |
|         | .....                                                                                                    | <i>Microchironomus tener</i>                       |
